# Supplementary material for: On the emergence of P-Loop NTPase and Rossmann enzymes from a Beta-Alpha-Beta ancestral fragment
Source: eLife journal article supplement (doi:10.7554/elife.64415), 2020-12-09

### Shikimate Kinase

ECOD: 2004.1.1.152

Example Domain: e2shkA1

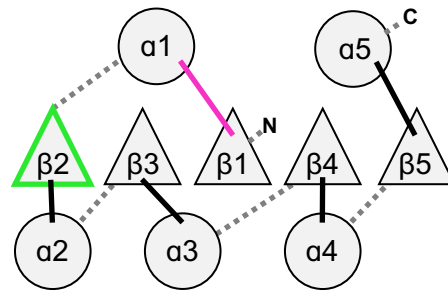

### CLPA protein, P-loop Domain

ECOD: 2004.1.1.190

Example Domain: e1r6bX4

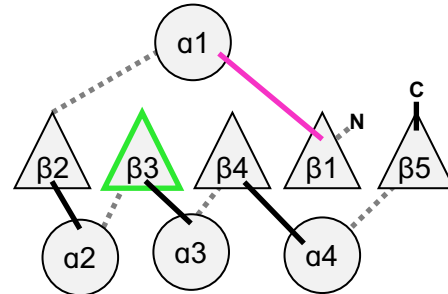

### Signal Recognition Particle Protein, P-loop Domain

ECOD: 2004.1.1.156

Example Domain: e1o87A2

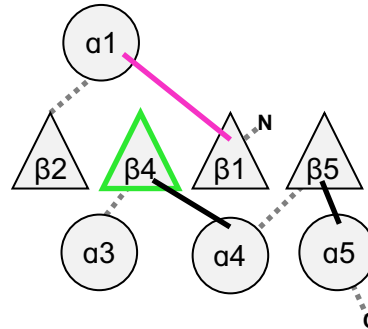

### RecA

ECOD: 2004.1.1.237

Example Domain: e1xmvA2

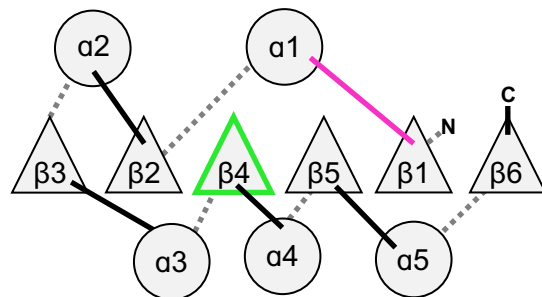

Supplement: supp [file elife-64415-supp-v1.zip]
