# Supplementary figures and images for: On the emergence of P-Loop NTPase and Rossmann enzymes from a Beta-Alpha-Beta ancestral fragment
Source: eLife journal article supplement (doi:10.7554/elife.64415), 2020-12-09

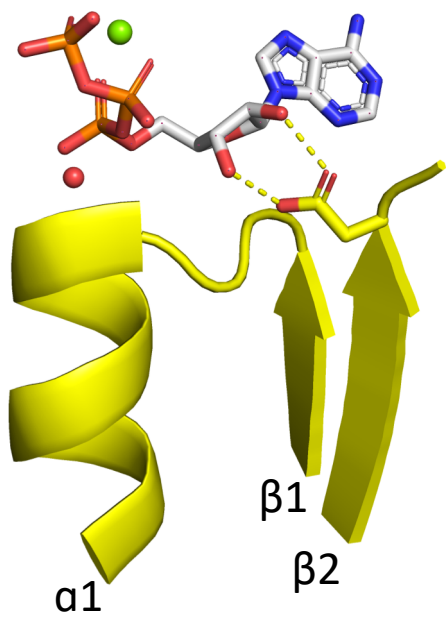

Supplement: supp [file elife-64415-supp-v1.zip]

Tubulin  
PDB:6GWC

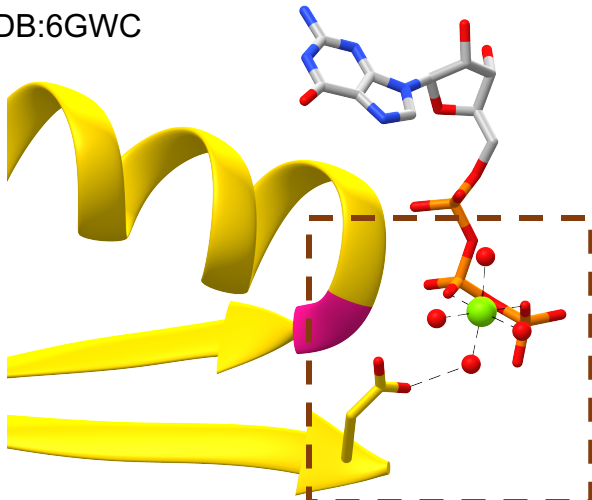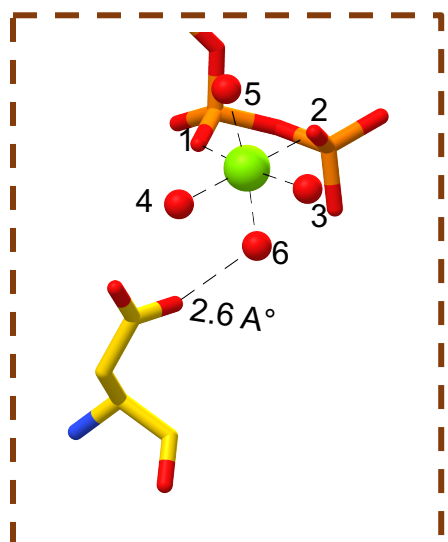

P-loop  
PDB:3OES

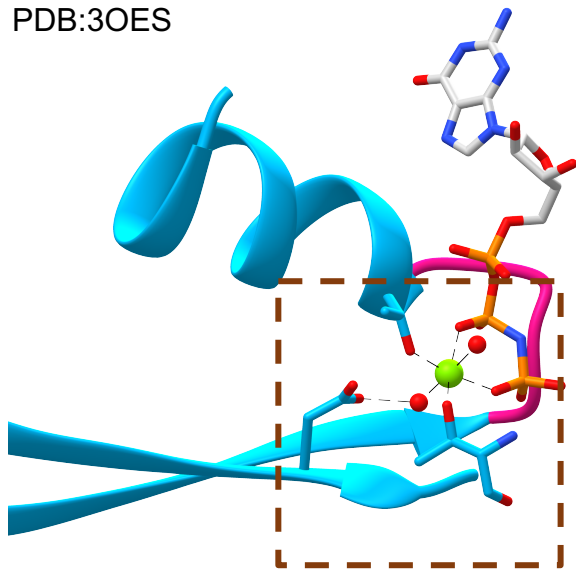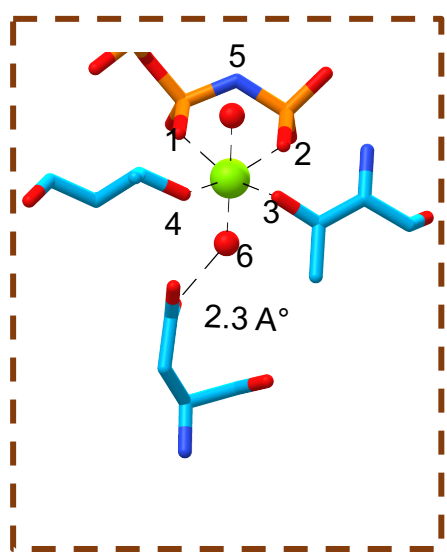

Supplement: supp [file elife-64415-supp-v1.zip]

**A**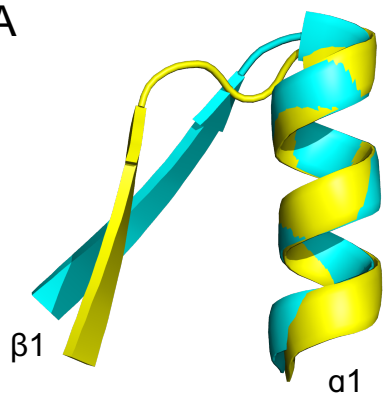**B**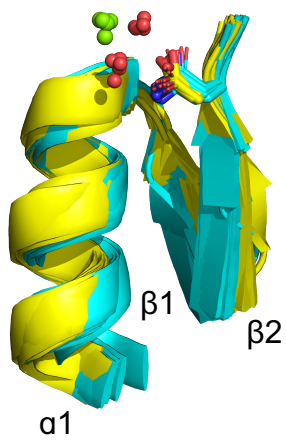

Supplement: supp [file elife-64415-supp-v1.zip]
